# Supplementary material for: Global and local knowledge networks spread regenerative agriculture in Europe
Source: Research Square preprint supplement (doi:10.21203/rs.3.rs-7519599/v1), 2025-09-04
Supplement: Supplementary file 1 [file 0bae682c31d8f3fba9e542d1.docx]

**Supplementary materials:**

Global and local knowledge networks spread regenerative agriculture in Europe

Corresponding author: Loekie Schreefel ([loekie.schreefel@wur.nl](mailto:loekie.schreefel@wur.nl))

Index

[Supplementary Questionnaire 2](#_Toc207715975)

[Supplementary Tables 3](#_Toc207715976)

[Supplementary Figures 13](#_Toc207715977)

[References 15](#_Toc207715978)

# Supplementary Questionnaire

**Part 1: general survey questions**

1. What is the name of your farm?
2. What farming system best characterizes your farm (livestock, arable, mixed crop-livestock)?
3. What is the size of your farm (hectares, cows, livestock units, employees)?
4. Where is your farm located?
5. How long have you been farming?
6. Are you a full-time farmer?
   1. If no, what is your off-farm occupations?
7. Do you consider yourself a regenerative farmer?
8. How long have you been considering yourself a regenerative farmer?

**Part 2: SNA related survey questions**

1. What regenerative practices are you applying on your farm?
2. List the specific sources you consult to acquire knowledge regarding your implemented regenerative practices (e.g. Gabe Brown, Commonland)?
3. Describe the source of information (NGO, neighbouring farmer, agricultural adviser, book author, researcher, equipment supplier).
4. What is the frequency of interaction with the knowledge source on a scale from 1 (low frequency) to 5 (high frequency)?
   1. Very frequent: occurs at least once per week.
   2. Frequent: occurs at least once per month but less than once per week.
   3. Occasional: occurs at least twice per year but less than once per month.
   4. Rare: occurs at most once per year.
5. What is the level of trust you have in the information source on a scale from 1 (low trust) to 5 (high trust)?
   1. Strong distrust: you strongly doubt the accuracy, reliability, or integrity of the source.
   2. Moderate distrust: you have some reservations about the source's credibility.
   3. Neutral: You neither actively trust nor distrust the source.
   4. Moderate trust: you generally consider the source reliable but remain open to scrutiny.
   5. Strong trust: you have high confidence in the source’s accuracy and reliability.

# Supplementary Tables

Supplementary Table 1. Descriptive information reported by self-identified regenerative farmers, including the number of practices mentioned, the knowledge sources mentioned, and the average number of sources used per case country. Data were collected in Germany (DE), the Netherlands (NL), France (FR), Spain (ES), and Portugal (PT); EUR represents the average across the five case countries.

| **Country** | **Practices mentioned**  **(no.)** | **Knowledge sources mentioned (no.)** | **Average sources per farmer (no.)** |
| --- | --- | --- | --- |
| DE | 36 | 148 | 6.4 |
| NL | 45 | 338 | 11.3 |
| FR | 32 | 209 | 11.6 |
| ES | 40 | 191 | 4.2 |
| PT | 26 | 65 | 5.9 |
| **EUR** | **52** | **834** | **6.5** |

Supplementary Table 2. Information sources mentioned during farmer interviews, categorized by actor role. In-degree values represent the total in-degree per actor role in the European network, calculated after merging parallel edges. Parallel edges indicate distinct knowledge flows about different practices between the same farmer and knowledge source.

| **Actor roles** | **In-degree** | **Percentage (%)** |
| --- | --- | --- |
| Author | 267 | 19 |
| Farmer(s) | 266 | 19 |
| Research or education | 266 | 19 |
| Advisory | 177 | 13 |
| Online content and media | 129 | 9 |
| NGOs | 109 | 8 |
| Respondent farmer | 70* | 5 |
| Value chain business | 67 | 5 |
| Others | 15 | 1 |
| Government agency | 14 | 1 |

**This number includes 12 edges (1%) where respondent farmers cited other respondent farmers, and 58 self-edges (auto-citations, 4%) where farmers cited themselves as sources of knowledge.*

Supplementary Table 3. Top 100 knowledge sources mentioned

| **N°** | **Actors** | **Actor role** | **Country** | **Indegree** | **Degree** | **Betweenness** |
| --- | --- | --- | --- | --- | --- | --- |
| 1 | Richard Perkins | Author | Sweden | 32 | 32 | 57946 |
| 2 | Allan Savory | Research or education | US | 29 | 29 | 72663 |
| 3 | Joel Salatin | Author | US | 28 | 28 | 56785 |
| 4 | Gabe Brown | Author | US | 16 | 16 | 41992 |
| 5 | Charles Dowding | Online content and media | UK | 16 | 16 | 8405 |
| 6 | Jean-Martin Fortier | Author | Canada | 15 | 15 | 18357 |
| 7 | Elaine Ingham | Research or education | US | 14 | 14 | 15041 |
| 8 | The Biggest Little Farm | Online Content and Media | US | 14 | 14 | 14926 |
| 9 | Dietmar Näser | Advisory | Germany | 12 | 12 | 21576 |
| 10 | Ernst Götsch | Research or education | Brazil | 12 | 12 | 15227 |
| 11 | Mark Shepard | Author | US | 10 | 10 | 16819 |
| 12 | John Kempf | Online Content and Media | US | 10 | 10 | 15526 |
| 13 | Kiss the Ground | Online Content and Media | US | 9 | 9 | 5640 |
| 14 | Masanobu Fukuoka | Farmer(s) | Japan | 8 | 8 | 12859 |
| 15 | Francesc Font | Farmer(s) | Spain | 8 | 8 | 8340 |
| 16 | Savory Institute | NGO | US | 8 | 8 | 7387 |
| 17 | Sepp Holzer | Author | Austria | 8 | 8 | 5519 |
| 18 | Darren J. Doherty | Author | Australia | 8 | 8 | 2520 |
| 19 | Bill Mollison | Author | Australia | 7 | 7 | 3322 |
| 20 | David Holmgren | Author | Australia | 7 | 7 | 3322 |
| 21 | Geoff Lawton | Research or education | Australia | 7 | 7 | 2500 |
| 22 | Climate Farmers | Advisory | Germany | 6 | 6 | 7457 |
| 23 | Friedrich Wenz | Advisory | Germany | 6 | 6 | 5778 |
| 24 | Jairo Restrepo Rivera | Research or education | Brazil | 6 | 6 | 5530 |
| 25 | Youngsang Cho | Farmer(s) | South Korea | 6 | 6 | 4815 |
| 26 | WUR | Research or education | The Netherlands | 6 | 6 | 2869 |
| 27 | We Are The Regeneration | NGO | The Netherlands | 6 | 6 | 2736 |
| 28 | Martin Crawford | Author | UK | 6 | 6 | 1566 |
| 29 | Ver de Terre Production | Research or education | France | 5 | 5 | 5805 |
| 30 | Pure Graze | Value Chain Business | The Netherlands | 5 | 5 | 3938 |
| 31 | Nova Crop Control | Advisory | The Netherlands | 5 | 5 | 3613 |
| 32 | Ferme du bec Hellouin | Research or education | France | 5 | 5 | 3459 |
| 33 | Sanne Beld | Advisory | The Netherlands | 5 | 5 | 2687 |
| 34 | Jaime Elizondo | Farmer(s) | US | 5 | 5 | 2306 |
| 35 | Wouter van Eck | Research or education | The Netherlands | 5 | 5 | 2279 |
| 36 | Taco Blom | Research or education | Belgium | 5 | 5 | 2036 |
| 37 | René Jochems | Advisory | The Netherlands | 5 | 5 | 1939 |
| 38 | Sonja Dreymann | Advisory | Germany | 5 | 5 | 1908 |
| 39 | Peter Vanhoof | Research or education | Poland | 5 | 5 | 1498 |
| 40 | Bodemzicht | Farmer(s) | The Netherlands | 5 | 5 | 1429 |
| 41 | Frédéric Thomas | Farmer(s) | France | 4 | 4 | 6543 |
| 42 | Claude et Lydia Bourguignon | Research or education | France | 4 | 4 | 6103 |
| 43 | Urs Mauk | Online Content and Media | Germany | 4 | 4 | 3206 |
| 44 | Rodale Institute | NGO | US | 4 | 4 | 2798 |
| 45 | WIJland | Advisory | The Netherlands | 4 | 4 | 2281 |
| 46 | Land van Ons | Online Content and Media | The Netherlands | 4 | 4 | 1623 |
| 47 | Jeff Lowenfels | Author | US | 4 | 4 | 1448 |
| 48 | Wayne Lewis | Author | US | 4 | 4 | 1448 |
| 49 | Theo Mulder | Advisory | The Netherlands | 4 | 4 | 1444 |
| 50 | Nicole Masters | Author | US | 4 | 4 | 1045 |
| 51 | P. Alfred Yeomans | Author | Australia | 4 | 4 | 918 |
| 52 | Warmonderhof | Research or education | The Netherlands | 4 | 4 | 499 |
| 53 | Onder Het Maaiveld | Online Content and Media | The Netherlands | 4 | 4 | 343 |
| 54 | No-till Growers | Online Content and Media | US | 4 | 4 | 170 |
| 55 | Jesse Frost | Online Content and Media | US | 4 | 4 | 67 |
| 56 | Schevichoven | Interviewed farmer | The Netherlands | 3 | 27 | 16370 |
| 57 | Peter Oosterhof | Interviewed farmer | The Netherlands | 3 | 17 | 7173 |
| 58 | Chambre d'agriculture | Government agency | France | 3 | 3 | 6102 |
| 59 | Christoff Fischer | Value Chain Business | Germany | 3 | 3 | 4426 |
| 60 | Johannes Storch | Online Content and Media | Germany | 3 | 3 | 4345 |
| 61 | Matt Powers | Author | US | 3 | 3 | 4045 |
| 62 | Regenerative Viticulture Foundation | NGO | UK | 3 | 3 | 3554 |
| 63 | Joseph Braun Freising | Farmer(s) | Germany | 3 | 3 | 2967 |
| 64 | Curtis Stone | Author | Canada | 3 | 3 | 2637 |
| 65 | Marc-André Selosse | Author | France | 3 | 3 | 2198 |
| 66 | Jordi Puig Roca | Research or education | Spain | 3 | 3 | 2004 |
| 67 | John D. Liu | Research or education | US | 3 | 3 | 1961 |
| 68 | Jesús Ignacio Simón Zamora | Research or education | Mexico | 3 | 3 | 1868 |
| 69 | Christoph Felgentreu | Advisory | Germany | 3 | 3 | 1794 |
| 70 | Vandana Shiva | Research or education | India | 3 | 3 | 1697 |
| 71 | Theo Nieuwenhuis | Advisory | The Netherlands | 3 | 3 | 1654 |
| 72 | Gérard Ducerf | Author | France | 3 | 3 | 1448 |
| 73 | André Voisin | Research or education | France | 3 | 3 | 1444 |
| 74 | IG Gesunder Boden | NGO | Germany | 3 | 3 | 1129 |
| 75 | Bij de Oorsprong | Value Chain Business | The Netherlands | 3 | 3 | 1095 |
| 76 | Pim Clotscher | Value Chain Business | The Netherlands | 3 | 3 | 784 |
| 77 | EARA | NGO | US | 3 | 3 | 549 |
| 78 | Eliot Coleman | Author | US | 3 | 3 | 495 |
| 79 | Anne Biklé | Author | US | 3 | 3 | 491 |
| 80 | David Montgomery | Author | US | 3 | 3 | 491 |
| 81 | Antonio Tucci | Farmer(s) | Spain | 3 | 3 | 474 |
| 82 | Paula Jarque | Farmer(s) | Spain | 3 | 3 | 474 |
| 83 | Toekomstboeren | NGO | The Netherlands | 3 | 3 | 471 |
| 84 | Commonland | NGO | The Netherlands | 3 | 3 | 409 |
| 85 | Peter Takens | Advisory | The Netherlands | 3 | 3 | 328 |
| 86 | Van Iersel | Value Chain Business | The Netherlands | 3 | 3 | 319 |
| 87 | Eugenio Gras | Farmer(s) | Spain | 3 | 3 | 268 |
| 88 | Daniel Mays | Author | US | 3 | 3 | 231 |
| 89 | Ketelbroek | Farmer(s) | The Netherlands | 3 | 3 | 195 |
| 90 | Velt | NGO | Belgium | 3 | 3 | 99 |
| 91 | Madelon Oostwoud | Farmer(s) | The Netherlands | 3 | 3 | 0 |
| 92 | Erve Kiekebos | Interviewed farmer | The Netherlands | 2 | 27 | 30934 |
| 93 | Gelukkige Groentes | Interviewed farmer | The Netherlands | 2 | 24 | 14208 |
| 94 | Pascal Boivin | Research or education | Switzerland | 2 | 2 | 12584 |
| 95 | Jammiekeshoeve | Interviewed farmer | The Netherlands | 2 | 20 | 10547 |
| 96 | Mathieu Archambeaud | Advisory | France | 2 | 2 | 7283 |
| 97 | Wijngaard Aan de Breede Beek | Interviewed farmer | The Netherlands | 2 | 17 | 7167 |
| 98 | SEO Birdlife | NGO | Spain | 2 | 2 | 6153 |
| 99 | KAIROS | Advisory | The Netherlands | 2 | 2 | 5280 |
| 100 | ISARA Lyon | Research or education | France | 2 | 2 | 4492 |

Supplementary Table 4. All meso-practices mentioned in which information was sourced.

| **Micro-practices** | **Count** | **Meso-practices** | **Count** |
| --- | --- | --- | --- |
| RA in general | 360 | RA in general | 360 |
| Agroforestry | 92 | Agroforestry and permaculture | 174 |
| Food forest | 35 |
| Permaculture | 28 |
| Syntropic farming | 19 |
| No tillage | 103 | Reduced/no tillage | 172 |
| Reduced tillage | 57 |
| Strip tillage | 11 |
| Use a roller-crimper | 1 |
| Composting | 77 | Composting | 114 |
| Compost tea | 34 |
| Vermicomposting | 2 |
| Humanure composting | 1 |
| Cover crops | 36 | Cover crops | 104 |
| Maximum soil cover | 23 |
| Catch crops | 18 |
| Under sowing | 15 |
| Vegetation cover | 10 |
| Year-round soil cover | 2 |
| Holistic grazing | 69 | Holistic grazing | 102 |
| Rotational/strip grazing | 28 |
| Voisin Rational Grazing | 5 |
| Crop diversification | 32 | Crop diversity | 80 |
| Intercropping | 16 |
| Strip cropping | 11 |
| Polyculture | 10 |
| Biointensive | 7 |
| Companion planting | 2 |
| Deep rooted species | 2 |
| Use organic fertilizers (e.g. animal manure) | 54 | Reduced/no artificial fertilizers | 79 |
| Biofertilizer | 12 |
| No synthetic fertilizer | 7 |
| Foliar application | 2 |
| Reduce artificial fertilizers | 2 |
| Sheep wool fertilizer | 2 |
| Circular system | 19 | Reduced/no external inputs | 73 |
| No synthetic inputs | 13 |
| Self-sufficiency | 11 |
| Minimize external inputs | 9 |
| Minimize synthetic inputs | 5 |
| No external inputs | 4 |
| Recycled/reused materials | 7 |
| No dependence on fossil fuel use | 2 |
| Input reduction | 3 |
| Effective microorganisms | 18 | Soil inoculation | 65 |
| Bio stimulants | 16 |
| Soil inoculation with microbiology | 13 |
| Bio inoculants | 10 |
| Organic-based preparations | 8 |
| Conservation agriculture | 23 | Other approaches to farming | 65 |
| Organic production | 18 |
| Market gardening | 6 |
| JADAM Organic Farming | 6 |
| Biodynamic agriculture | 5 |
| Micro-farming | 3 |
| Natural farming | 2 |
| Lean farming | 2 |
| Monitoring | 62 | Monitoring | 62 |
| Biodiversity shelters (e.g. bushes) | 18 | Habitat provision | 61 |
| Trees and hedges | 17 |
| Flower/herb/nature strips | 12 |
| Bushes and trees as wind borders | 3 |
| Insect hotels | 3 |
| Habitat provision | 3 |
| Bird and bat boxes | 2 |
| Riparian buffers | 2 |
| Natural buffer zones | 1 |
| Grass strips | 1 |
| Mulching | 56 | Mulching | 60 |
| Wood chips | 4 |
| Natural water harvesting | 23 | Water storage | 55 |
| Water reservoirs | 14 |
| Water buffers | 3 |
| Infiltration channels | 3 |
| Water filtration | 3 |
| Dikes | 3 |
| Pond | 3 |
| Swales | 3 |
| Soil Fertility Management | 44 | Soil fertility management | 51 |
| Soil Management | 7 |
| Integrated pest management | 19 | Reduced/no synthetic pesticides | 43 |
| No synthetic pesticides | 12 |
| Natural pest management | 9 |
| No herbicides | 2 |
| Reduce synthetic pesticides | 1 |
| Green manure | 36 | Green manure | 36 |
| Legumes | 34 | N-fixing plants | 34 |
| Herb-rich grassland | 29 | Herb-rich grassland | 31 |
| Grassland diversity | 2 |
| Crop rotation | 30 | Crop rotation | 30 |
| Direct seeding | 29 | Direct seeding | 29 |
| Holistic management | 28 | Holistic management | 28 |
| Crop - livestock integration | 23 | Crop-livestock integration | 26 |
| Agro-silvo-pastoralism | 2 |
| Polyface farming | 1 |
| Local or native crop and animal species | 23 | Local or native crop and animal species | 23 |
| Keyline design | 21 | Keyline design | 21 |
| No heavy machinery | 12 | Reduce machinery | 17 |
| Manual/low tech farming | 2 |
| Minimize soil disturbance | 1 |
| Reduce mechanization | 1 |
| Reduce heavy machinery | 1 |
| Animal welfare practices | 16 | Animal welfare practices | 16 |
| Mobile chicken coops | 16 | Mobile chicken coops | 16 |
| Financial resilience and sustainable business models | 14 | Sustainable farm income | 15 |
| Financial diversification | 1 |
| Community involvement | 13 | Community involvement | 13 |
| Animal diversity | 14 | Livestock diversification | 13 |
| Double purpose cows | 2 |
| Pruning | 3 | Other practices | 12 |
| Other practices | 2 |
| Marine inputs | 2 |
| Create wetlands | 1 |
| No plastic | 1 |
| Free-range breeding system | 1 |
| Biochar | 12 | Biochar | 12 |
| Extensive grazing | 12 | Extensive grazing | 12 |
| Knowledge exchange & capacity Building | 11 | Knowledge exchange | 12 |
| Provide training | 1 |
| Use perennials | 10 | Use perennials | 12 |
| Perennial pastures | 2 |
| Reduce concentrate feed | 5 | Reduce concentrate feed | 10 |
| No concentrate feed | 5 |
| Short value chain | 9 | Locally produced | 9 |
| Stone flower | 4 | Soil amendments | 8 |
| Natural amendments | 3 |
| Zeolite | 1 |
| Permanent grassland | 7 | Permanent grassland | 7 |
| Bokashi | 7 | Bokashi | 7 |
| Pollinator integration | 3 | Pollinator integration | 7 |
| Reduce water use | 6 | Minimize water use | 7 |
| Drip irrigation | 1 |
| Controlled traffic lanes | 6 | Controlled traffic lanes | 6 |
| Other | 8 | Other | 6 |
| Keep living roots | 6 | Keep living roots | 6 |
| High-tech practices | 5 | Mechanization | 5 |
| More free time | 4 | More free time | 4 |
| Avoid antibiotics | 3 | Avoid antibiotics | 3 |
| Mechanical weeding | 1 | Weeding | 2 |
| Integrated weed management | 1 |
| Certification | 2 | Certification | 2 |

Supplementary Table 5. Frequency of interaction of farmers with knowledge sources. The frequency of interactions represents the number of raw edges in the European network prior to merging parallel edges.

| **Frequency rate** | **Frequency of interaction (no.)** | **Percentage of total (%)** |
| --- | --- | --- |
| Very frequent | 422 | 19 |
| Frequent | 592 | 27 |
| Occasional | 273 | 12 |
| Rare | 930 | 42 |
| **Total:** | **2217** | **100%** |

Supplementary Table 6. Trust of farmers on their knowledge sources. The frequency rated represents the number of raw edges in the European network prior to merging parallel edges.

| **Trust rate** | **Frequency rated (no.)** | **Percentage of total (%)** |
| --- | --- | --- |
| Strong distrust | 3 | 0 |
| Moderate distrust | 22 | 1 |
| Neutral | 190 | 9 |
| Moderate trust | 906 | 42 |
| Strong trust | 1056 | 49 |
| **Total:** | **2177*** | **100%** |
| **Trust scores were missing for 40 out of the 2217 edges. As trust was removed from subsequent analysis, results were not affected.* | | |

Supplementary Table 7. Farmers that accepted interviews in Germany (DE), the Netherlands (NL), France (FR), Spain (ES), Portugal (PT), and Europe as average of the five case-countries (EUR).

| **Country** | **Farmers identified** | **Farmer interviewed** | **Response rates** |
| --- | --- | --- | --- |
| DE | 67 | 23 | 34 |
| NL | 40 | 30 | 75 |
| FR | 37 | 18 | 49 |
| ES | 94 | 46 | 49 |
| PT | 42 | 11 | 26 |
| **EUR** | **280** | **128** | **46** |

Supplementary Table 8. Threshold values to determine actor sizes. Thresholds values were used to determine actor sizes following Schreefel et al. 1. These were sector specific and based on national inventories, ranging from very small to very large. Some clusters were adapted from the national inventories to maintain five ranges of actor sizes; these clusters are marked with an Asterix. Mixed (crop-livestock) farming systems, were too diverse to be benchmarked against national inventories. Their sizes were based on their dominant operations (arable or livestock) and clustered in a respective size category.

| **Cat.** | **Country** | | **Unit** | | **1. Very small** | | **2. Small** | | | **3. Medium** | | **4. Large** | | **5.Very large** | | **Ref.** |
| --- | --- | --- | --- | --- | --- | --- | --- | --- | --- | --- | --- | --- | --- | --- | --- | --- |
| **Arable** | DE | | Area (ha) | | ≤10 | | >10-50 | | | >50-100 | | >100-200 | | >200 | | 2 |
| NL | | Area (ha) | | ≤10 | | >10-50 | | | >50-100 | | >100-300 | | >300 | | 3 |
| FR | | Area (ha) | | ≤10 | | >10-50 | | | >50-100 | | >100-200 | | >200 | | 4 |
| ES | | Area (ha) | | ≤6 | | >6-13 | | | >13-30 | | >30-70 | | >70 | | 5 |
| PT | | Area (ha) | | ≤1 | | >1-5 | | | >5-20 | | >20-100 | | >100 | | 6 |
| **Dairy** | DE | | Cows (n) | | ≤20 | | >20-50 | | | >50-100 | | >100-200 | | >200 | | 7 |
| NL | | Cows (n) | | ≤50 | | >50-100 | | | >100-150 | | >150-250 | | >250 | | 8 |
| FR | | Cows (n) | | ≤40 | | >40-60 | | | >60-80 | | >80-150 | | >150 | | 9 |
| ES | | Area (ha) | | ≤4 | | >4-12 | | | >12-29 | | >29-81 | | >81 | | 10 |
| PT | | LU | | ≤10 | | >10-50 | | | >50-100 | | >100-300 | | >300 | | 6 |
| **Horticulture** | DE | | Area (ha) | | ≤1 | | >1-5 | | | >5-10 | | >10-20 | | >20 | | 7 |
| NL | | Area (ha) | | ≤1.25 | | >1.25-2.5 | | | >2.5-5 | | >5-10 | | >10 | | 11 |
| ES | | Area (ha) | | ≤0.8 | | >0.8-1.2 | | | >1.2-2.0 | | >2.0-4.6 | | >4.6 | | 10 |
| **Orchards** | DE | | Area (ha) | | ≤2 | | 2-5 | | | 5-10 | | 10-20 | | >20 | | 12 |
| NL | | Area (ha) | | ≤1 | | >1-5 | | | >5-10 | | >10-20 | | >20 | | 13 |
| ES | | Area (ha) | | ≤0.7 | | >0.7-1.6 | | | >1.6-3.8 | | > 3.8-10.9 | | >10.9 | | 10 |
| **Private sector** | DE | | Employees (n) | | ≤10 | | 10-50 | | | 50-250 | | 250-500 | | >500 | | 14 |
| NL | | Employees (n)* | | ≤5 | | >5-10 | | | >10-50 | | >50-100 | | >100 | | 15 |
| FR | | Employees (n) | | ≤1 | | >2-10 | | | >10-50 | | >50-200 | | >201 | | 16 |
| ES | | Employees (n) | | ≤9 | | >9-20 | | | >20-50 | | >50-250 | | >250 | | 17 |
| PT | | Employees (n) | | ≤1 | | >2-10 | | | >10-50 | | >50-100 | | >100 | | 6 |
| **Projects** | DE | | Capital (€ x 1,000) | | ≤100 | | >100-500 | | | >500-1,000 | | >1,000-5,000 | | >5,000 | | Expert judgement |
| NL | | Capital (€ x 1,000) | | ≤100 | | >100-500 | | | >500-1,000 | | >1,000-5,000 | | >5,000 | | Expert judgement |
| FR | | Capital (€ x 1,000) | | ≤100 | | >100-500 | | | >500-1,000 | | >1,000-5,000 | | >5,000 | | Expert judgement |
| ES | | Capital (€ x 1,000) | | ≤100 | | >100-500 | | | >500-1,000 | | >1,000-5,000 | | >5,000 | | Expert judgement |
| PT | | Capital (€ x 1,000) | | ≤100 | | >100-500 | | | >500-1,000 | | >1,000-5,000 | | >5,000 | | Expert judgement |
| **Cat.** | | **Country** | | **Unit** | | **1. Very small** | | **2. Small** | **3. Medium** | | **4. Large** | | **5.Very large** | | **Ref.** | |
| **Pigs** | | DE | | Pigs (n) | | ≤100 | | >100-400 | >400-1,000 | | >1,000-2,000 | | >2,000 | | 7 | |
| NL | | Pigs (n) | | ≤500 | | >500-1,500 | >1,500-3,000 | | >3,000-7,500 | | >7,500 | | 18 | |
| **Flowers** | | NL | | Area (ha) | | ≤25 | | >25-50 | >50-100 | | >100-150 | | >150 | | 19 | |
| **Granivore farms** | | ES | | Area (ha) | | ≤2.2 | | >2.2-7.9 | >7.9-20.6 | | >20.6-55.4 | | >55.4 | | 5 | |
| **Mixed livestock** | | ES | | Area (ha) | | ≤3.5 | | >3.5-20.2 | >20.2-73.4 | | > 73.4-213.4 | | >213.4 | | 5 | |

Supplementary Table 9. Description of actor type used in the SNA.

| **Actor type** | **Description** |
| --- | --- |
| **Advisory** | Services that concentrate on providing strategic guidance and advice on high-level business issues or specific problems and challenges (e.g., big international consultancy groups, or local self-employed farm advisory services). |
| **Author** | Actor identified as the originator of written or published content (e.g., books, or guides). |
| **Farmer(s)** | An individual farmer (e.g., a neighbouring livestock farmer) or a group of farmers (e.g., a farmer network), acting only as a source of knowledge (alter only) in the networks. |
| **Government agency** | Public institutions or administrative bodies at local, regional or national level (e.g., regional public services). |
| **Respondent farmer** | Self-identified regenerative farmers (ego and alter) interviewed as part of the study. |
| **NGOs** | Non-Governmental Organization and civil society entity (e.g., nature conservation groups) |
| **Online content and media** | Actors diffusing knowledge through online and media platforms (e.g., YouTube channels, blogs, podcasts, or TV shows). |
| **Research or education** | Actors engaged in research or educational activities (e.g., universities, research institutes, or educational programs). |
| **Value chain business** | Private-sector actor involved in agricultural value chain (e.g., processors, suppliers, distributors, or retailers). |
| **Other actors** | Other actor types not captured by the current classification (e.g., conference, agriculture certification, or quality label) |

Supplementary Table 10. Classification of practices mentioned and aggregated into meso-clusters. The following list presents the top eight meso-practices adapted from Schreefel et al.1, along with two additional categories: ‘Others’ and ‘Multiple Practices’.

| **Meso-practices** | **Micro-practices** |
| --- | --- |
| Agroforestry and permaculture | Agroforestry; Food Forest; Syntropic farming; Permaculture |
| Reduced/no tillage | Reduced tillage; No tillage; Strip tillage; Use a roller-crimper |
| Composting | Composting; Humanure composting; Vermicomposting; Compost tea |
| Cover crops | Cover crops; Catch crops; Under sowing; Maximum soil cover; Vegetation cover; Year-round soil cover |
| Holistic grazing | Holistic grazing; Voisin Rational Grazing; Rotational/strip grazing |
| Crop diversity | Crop diversification; Polyculture; Intercropping; Companion planting; Biointensive; Strip cropping; Deep rooted species |
| Reduced/no artificial fertilizers | Reduce artificial fertilizers; No synthetic fertilizer; Use organic fertilizers (e.g. animal manure); Biofertilizer; Foliar application; Sheep wool fertilizer |
| Other practices | Agro-silvo-pastoralism; Animal diversity; Animal welfare practices; Avoid antibiotics; Bio inoculants; Biochar; Biodiversity shelters (e.g. bushes); Biodynamic agriculture; Bio stimulants; Bird and bat boxes; Bokashi; Bushes and trees as wind borders; Certification; Circular system; Community involvement; Conservation agriculture; Controlled traffic lanes; Create wetlands; Crop - livestock integration; Crop rotation; Dikes; Direct seeding; Double purpose cows; Drip irrigation; Effective microorganisms; Extensive grazing; Financial diversification; Financial resilience and sustainable business models; Flower/herb/nature strips; Free-range breeding system; Grass strips; Grassland diversity; Green manure; Habitat provision; Herb-rich grassland; High-tech practices; Holistic management; Infiltration channels; Input reduction; Insect hotels; Integrated pest management; Integrated weed management; JADAM; Organic Farming; Keep living roots; Keyline design; Knowledge exchange & capacity Building; Legumes; Local or native crop and animal species; Manual/low tech farming; Marine inputs; Market gardening; Mechanical weeding; Micro-farming; Minimize external inputs; Minimize soil disturbance; Minimize synthetic inputs; Mobile chicken coops; Monitoring; More free time; Mulching; Natural amendments; Natural buffer zones; Natural farming; Natural pest management; Natural water harvesting; No concentrate feed; No dependence on fossil fuel use; No external inputs; No heavy machinery; No herbicides; No plastic; No synthetic inputs; No synthetic pesticides; Organic production; Organic-based preparations; Other; Other practices; Perennial pastures; Permanent grassland; Pollinator integration; Polyface farming; Pond; Provide training; Pruning; Recycled/reused materials; Reduce concentrate feed; Reduce heavy machinery; Reduce mechanization; Reduce synthetic pesticides; Reduce water use; Riparian buffers; Self-sufficiency; Short value chain; Soil Fertility Management; Soil inoculation with microbiology; Soil Management; Stone flower; Swales; Trees and hedges; Use perennials; Water buffers; Water filtration; Water reservoirs; Wood chips; Zeolite |
| Regenerative practices in general | Regenerative practices in general (without mentioning any specific practices) |
| Multiple practices | All relations involving exchanges on more than one of the previous nine practice clusters (parallel edges) |

Supplementary Table 11. Description of the network metrics used

| **Metric** | **Equation** | **Description** |
| --- | --- | --- |
| In-degree |  | Number of edges leading to a node , representing the number of times an actor was cited as a source of knowledge. Actors with a high in-degree are considered important knowledge sources. |
| Out-degree |  | Number of edges emanating from a node representing the number of sources cited by a farmer. Farmers with a high out-degree use many knowledge sources. |
| Betweenness centrality |  | Extent to which a node lies on the shortest paths between other nodes. Shows actor’s potential to act as a broker or bridge in knowledge diffusion. |
| represents each node,   each edge, is the transmitter node of (the respondent citing a source) is the receiving node of (the knowledge source being cited), denotes the number of shortest paths from to that pass through node ,  represents the total number of shortest paths (geodesics) connecting node *s* and *t* in the network. | | |

# Supplementary Figures


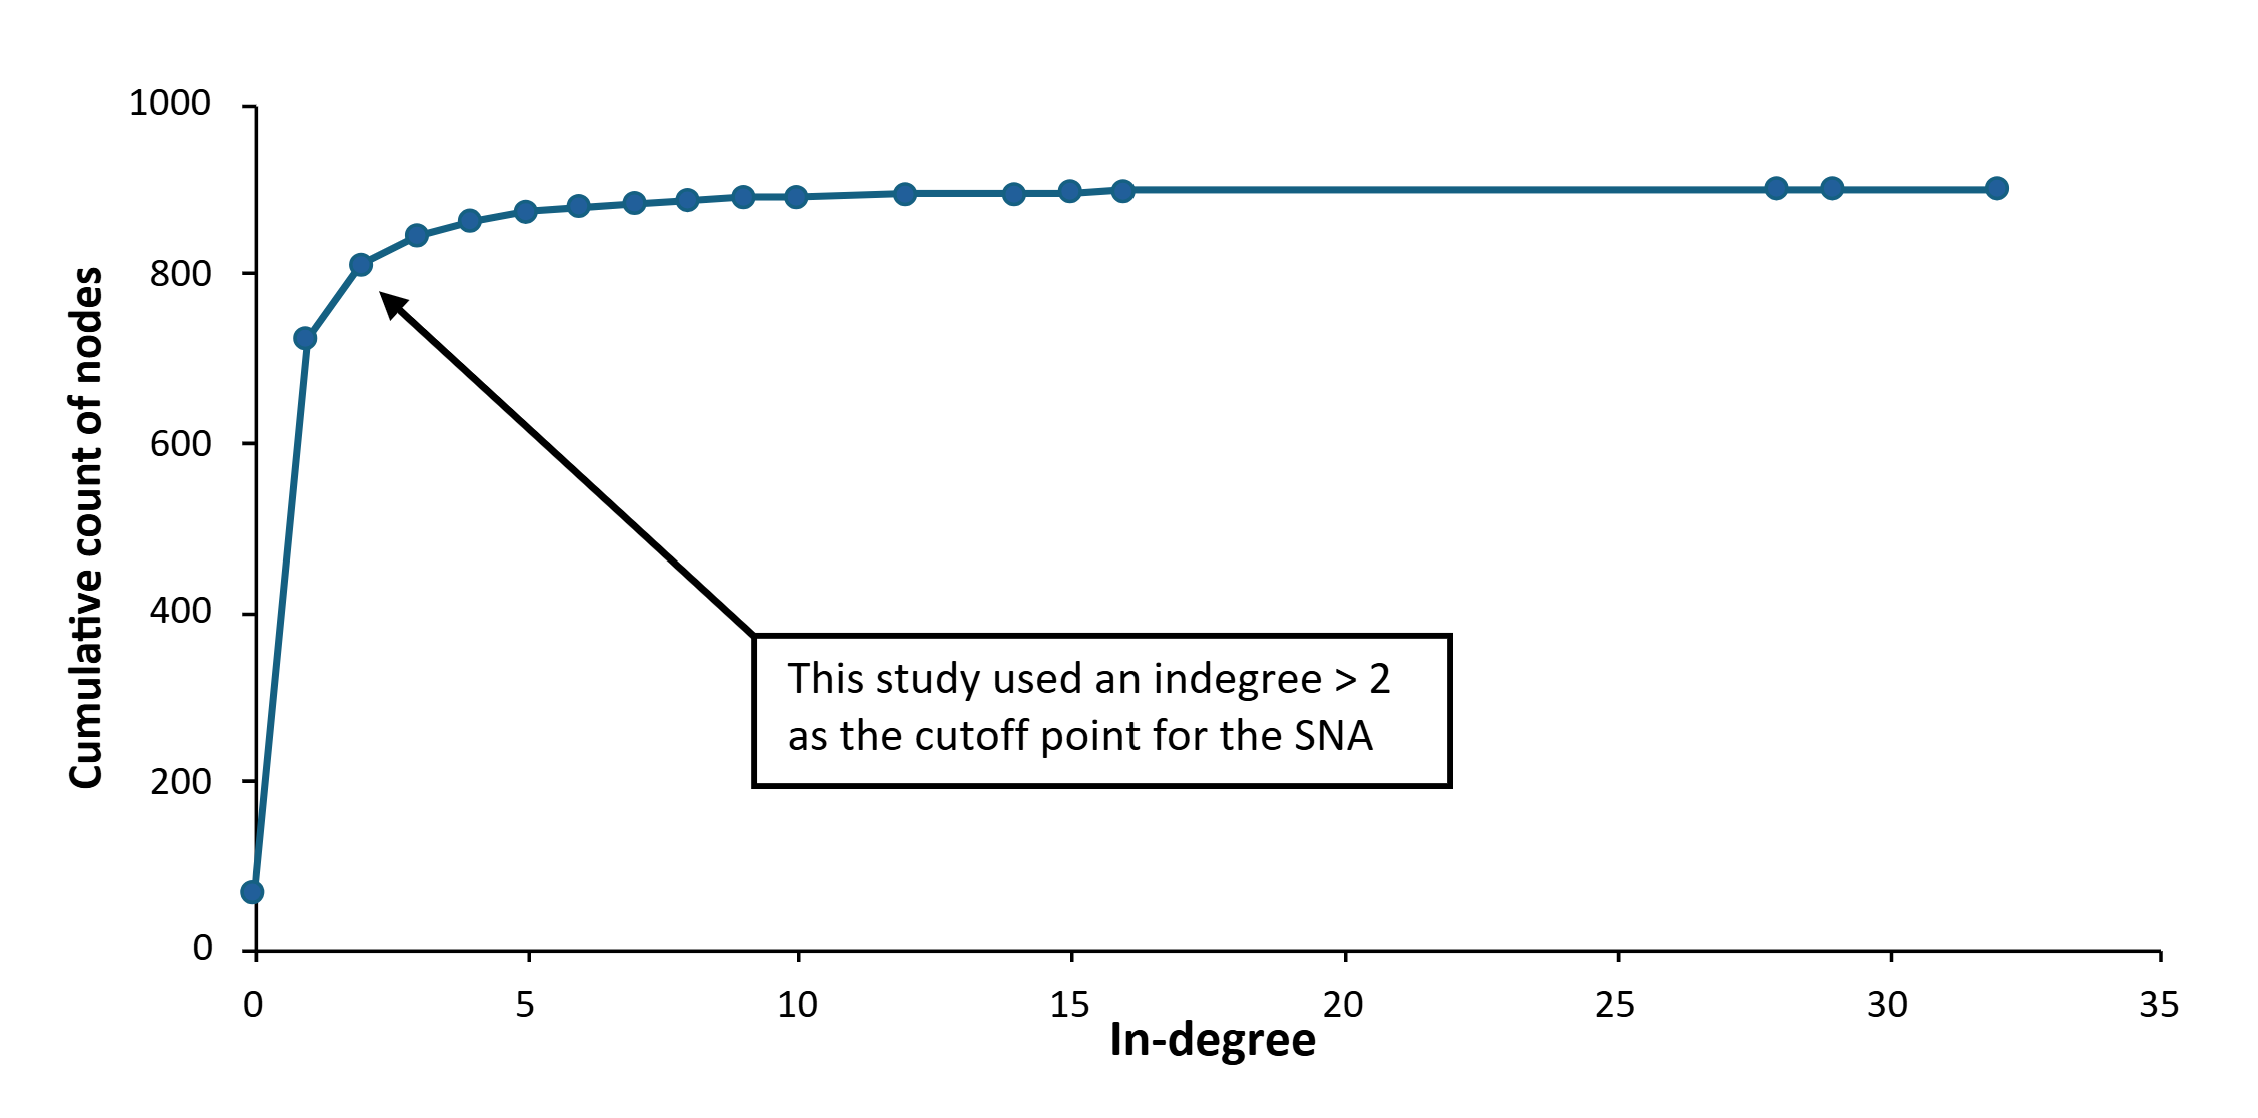


Supplementary Fig 1. Cumulative distribution of knowledge sources (nodes) with their frequency referenced (in-degree). This cutoff point is applied solely in the detailed network visualization (Figure 3b) of the main text to improve readability.


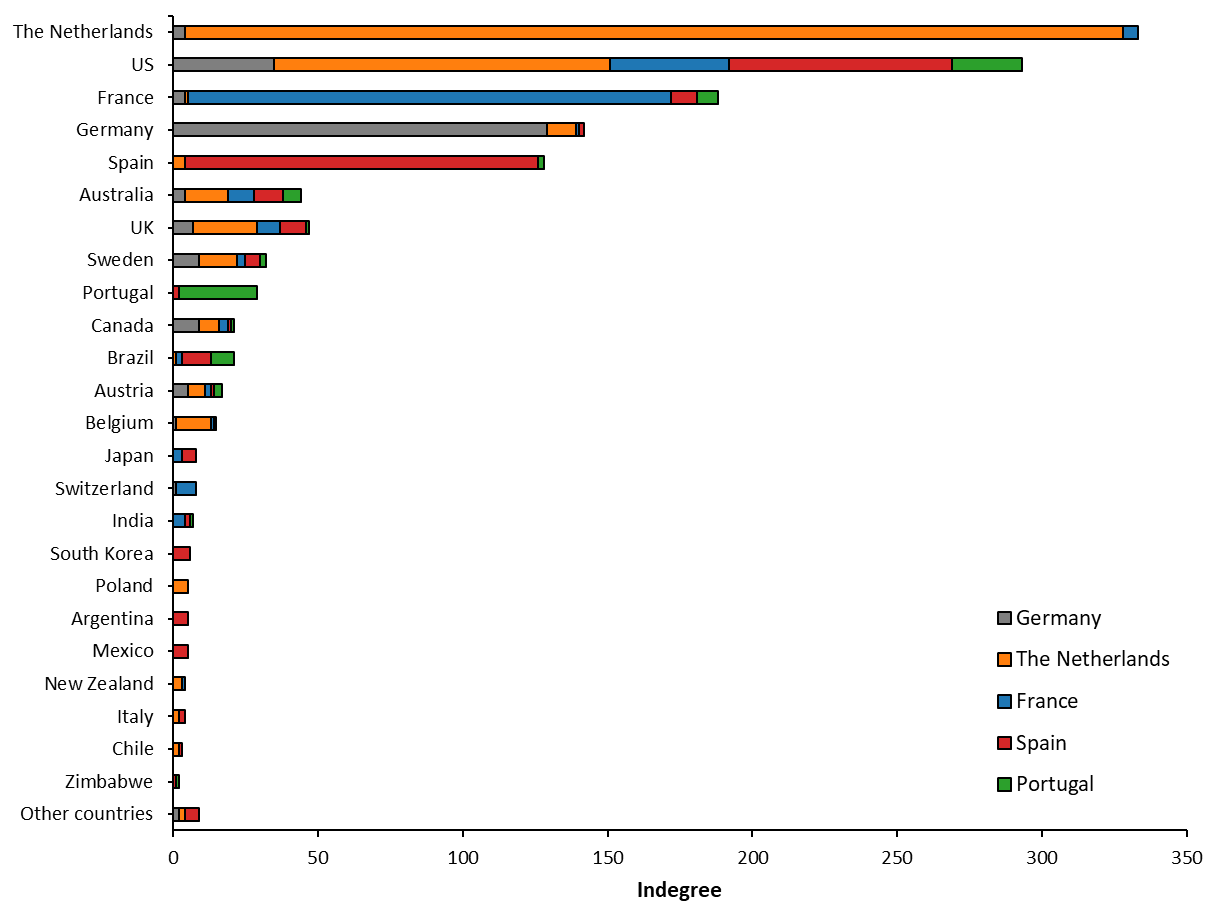


Supplementary Fig 2. Country specific information on the use of (inter) national knowledge sources. The category “Other countries” includes (by decreasing in-degree): Ireland, Thailand, Russia, Tasmania, Uruguay, Lebanon, Tanzania, Slovenia, and Hungary.


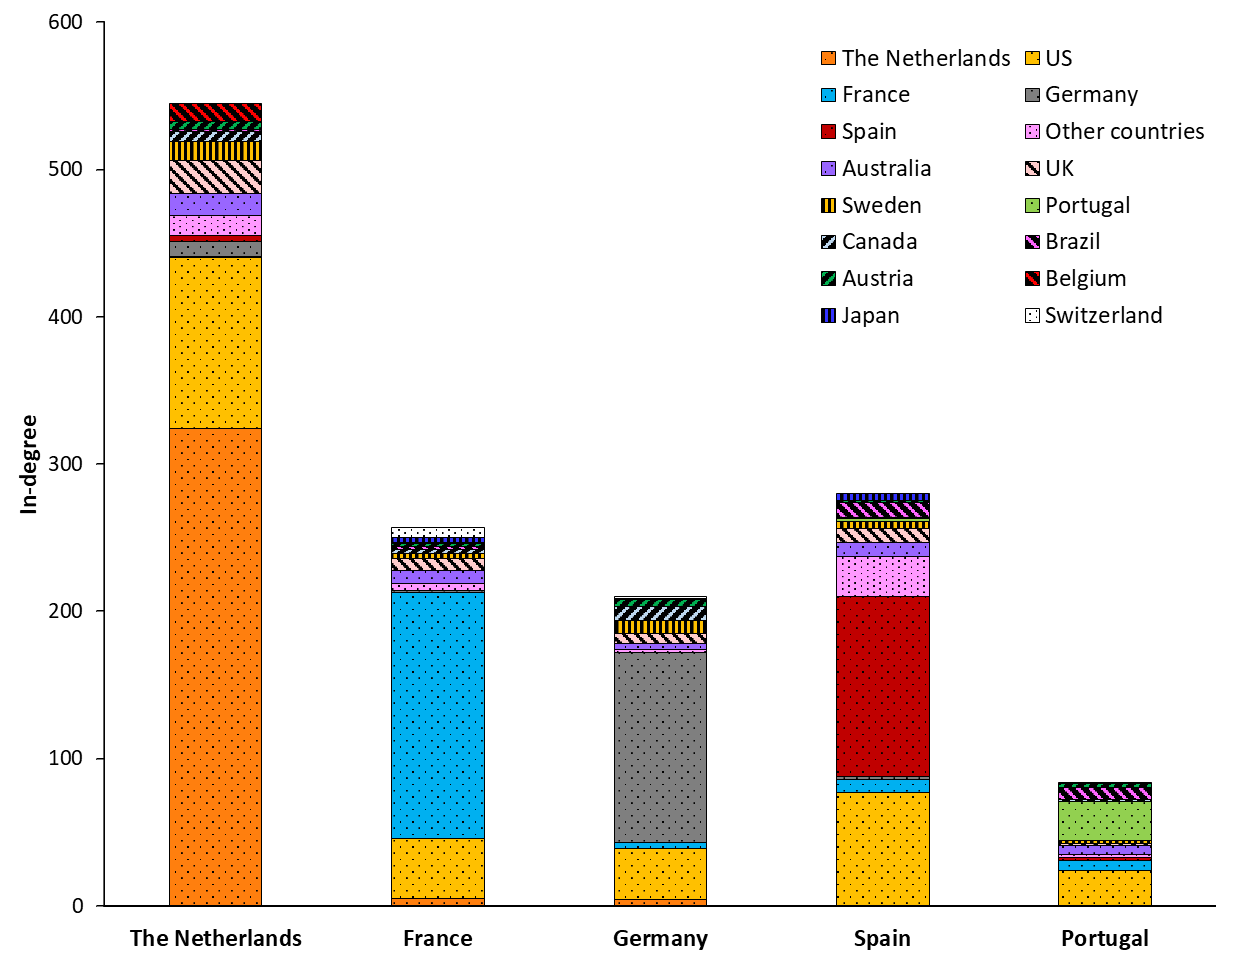


Supplementary Fig 3. In-degree by country of knowledge sources for each of the five case-study countries.

# References

1. Schreefel. Beyond the Buzz: analysing actors promoting regenerative agriculture in Europe. (2025).
2. BMEL. Tabellen zur Landwirtschaft. https://www.bmel-statistik.de/landwirtschaft/tabellen-zur-landwirtschaft#c8262 (2023).
3. CBS. Bedrijven met akkerbouw per grootteklasse, 2000-2018*. https://www.cbs.nl/nl-nl/maatwerk/2018/47/bedrijven-met-akkerbouw-per-grootteklasse-2000-2018- (2018).
4. Statista. Nombre d’exploitations selon la Superficie Agricole Utilisée (SAU) en France en 2010 et 2020. https://fr-statista-com.ezproxy.library.wur.nl/statistiques/1294799/nombre-de-fermes-par-superficie-france/ (2025).
5. INE. Agricultural Census 2020. https://ine.es/dyngs/INEbase/es/operacion.htm?c=Estadistica_C&cid=1254736176851&menu=resultados&idp=1254735727106#_tabs-1254736194955 (2020).
6. INE. *Farm Structure Survey 2016*. file:///C:/Users/schre064/Downloads/IEEA_2016a_EN.pdf (2017).
7. BMEL. Tabellen zur Landwirtschaft. https://www.bmel-statistik.de/landwirtschaft/tabellen-zur-landwirtschaft#c8266 (2020).
8. Agrimatie. Schaalgrootte en inkomen melkveehouderij. https://agrimatie.nl/PublicatiePage.aspx?subpubID=2525&sectorID=2245&themaID=7458&indicatorID=7452 (2018).
9. Agreste. *Les Exploitations Bovines Laitières En France Métropolitaine En 2020*. https://agreste.agriculture.gouv.fr/agreste-web/download/publication/publie/Dos2304/Dossiers2023-4_BovinsLait.pdf (2023).
10. INE. Censo Agrario 2020. (2024).
11. Agrimatie. Bedrijfsgrootte van glastuinbouwbedrijven. (2024).
12. BMEL. Tabellen zur Landwirtschaft. https://www.bmel-statistik.de/landwirtschaft/tabellen-zur-landwirtschaft#c8264 (2022).
13. LEI. *Takverkenning Fruitteelt*. https://edepot.wur.nl/266529 (1998).
14. Statistisches Bundesamt. Rechtliche Einheiten und abhängig Beschäftigte nach Beschäftigten­größen­klassen und Wirtschaftsabschnitten. https://www.destatis.de/DE/Themen/Branchen-Unternehmen/Unternehmen/Unternehmensregister/Tabellen/unternehmen-beschaeftigtengroessenklassen-wz08.html?nn=208520 (2022).
15. CBS. Aantal bedrijven naar sector en aantal werknemers, 2020. (2021).
16. Microsoft. Company Size Codes. https://learn.microsoft.com/en-us/linkedin/shared/references/reference-tables/company-size-codes (2023).
17. Eurostat. Enterprise statistics by size class and NACE Rev.2 activity (from 2021 onwards). https://ec.europa.eu/eurostat/databrowser/view/sbs_sc_ovw/default/table?lang=en&category=bsd.sbs.sbs_ovw (2022).
18. Agrimatie. Schaalgrootte en inkomen varkensbedrijven. https://agrimatie.nl/PublicatiePage.aspx?subpubID=2525&sectorID=2255&themaID=7458&indicatorID=7452 (2018).
19. Agrimatie. Bedrijfsgrootte van bloembollenbedrijven. https://agrimatie.nl/noord-holland/kerncijfers/bedrijfsgrootte-van-bloembollenbedrijven/ (2024).
